# Supplementary material for: Tremella fuciformis Crude Polysaccharides Attenuates Steatosis and Suppresses Inflammation in Diet-Induced NAFLD Mice
Source: MDPI journal article supplement (doi:10.3390/cimb44030081), 2022-03-03
Supplement: s1 [file s1]

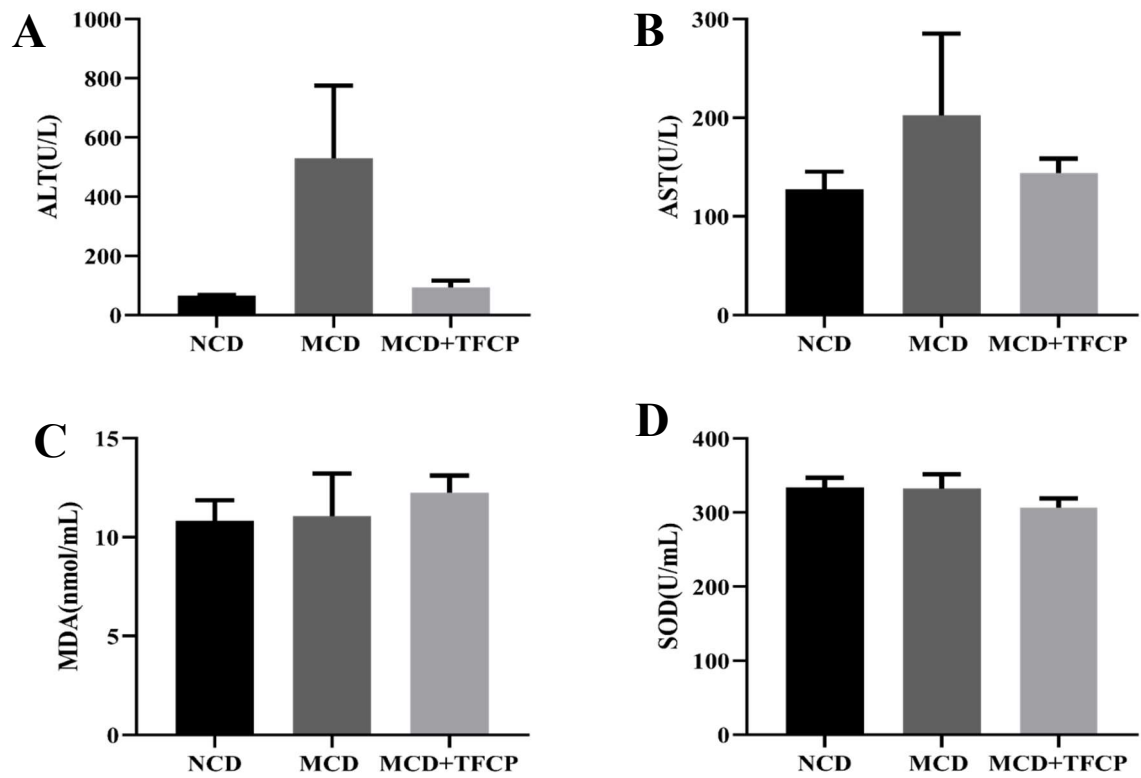

**Figure S1.** TFCP suppressed hepatic inflammation and oxidative stress in a different group of mice. Mice were fed with MCD or control diet for six weeks, while intragastric administration of TFCP to MCD-fed mice was performed daily. Means  $\pm$  SEM of results in the graph was obtained using NCD ( $n = 5$ ), MCD diet-fed group ( $n = 5$ ) and MCD+TFCP ( $n = 5$ ).
